# Supplementary material for: InGaAs Diodes for Terahertz Sensing—Effect of Molecular Beam Epitaxy Growth Conditions
Source: PubMed Central journal article supplement (PMC6264118; doi:10.3390/s18113760), 2018-11-03
Supplement: sensors-18-03760-s001.pdf [file sensors-18-03760-s001.pdf]

## Supplementary materials

### Experimental set-up for low-frequency noise measurements

Noise characteristics were measured in frequency range from 10 Hz to 20 kHz and lattice temperature ranging from 77 K to 300 K at forward and backward bias. The measuring system comprises of low-noise amplifier, filter system and analog-to-digital converter (National Instruments™ PCI 6115 board) (Fig. 1) [1]. The voltage noise measurements were performed in a constant current mode (the load resistance was at least 30-50 times higher than the resistance of the sample).

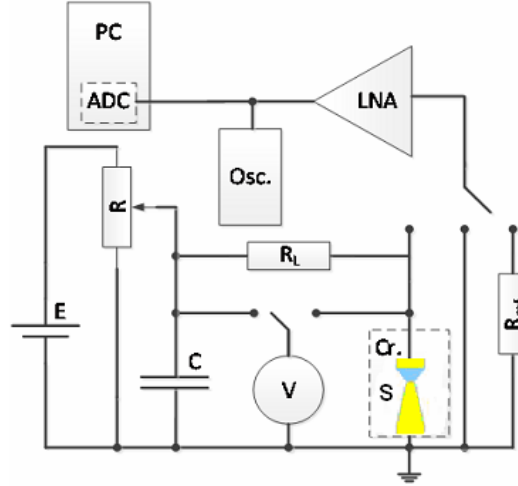

**Figure 1.** The noise measurement circuit: S is the investigated bow-tie detector;  $R_L$  denotes the load resistor;  $R_{ref}$  is the reference resistor; LNA stands for the low-noise amplifier; ADC labels the analog-to-digital converter (National Instruments™ PCI 6115 board); PC is the personal computer; Osc. shows the oscilloscope; Cr. indicates the cryostat (DN 7704); and V denotes the voltmeter.

The noise signal was processed with a computer-based fast Fourier transform signal analyzer. The voltage fluctuation spectral density was evaluated by comparison with thermal noise of the reference resistor [2] as follows:

$$S_U = \frac{\langle V^2 \rangle - \langle V_s^2 \rangle}{\langle V_{ref}^2 \rangle - \langle V_s^2 \rangle} 4kT_0 R_{ref} \quad (1)$$

where  $\langle V^2 \rangle$ ,  $\langle V_s^2 \rangle$  and  $\langle V_{ref}^2 \rangle$  are respectively the sample, measurement system including sample thermal noise, and the reference resistor thermal noise variances in the narrow frequency band  $\Delta f$ ;  $T_0$  is the absolute temperature of the reference resistor;  $k$  is the Boltzmann's constant. The noise measurements were performed in a specially shielded room (Faraday cage) in order to avoid the interfering effects from electrical network and communication systems.

[1] Minkevičius, L.; Ragauskas, M.; Matukas, J.; Palenskis, V.; Pralgauskaitė, S.; Seliuta, D.; Kašalynas, I.; Valušis, G. InGaAs Bow-tie Diodes for Terahertz Imaging: Low Frequency Noise Characterization. Proc. SPIE Terahertz Emitters, Receivers, and Applications III, San Diego, CA, USA, 12-13 Aug 2012, Eds. M. Razeghi, A. N. Baranov, H. O. Everitt, J. M. Zavada; T. Manzur, **2012**, 8496, 849612, DOI. 10.1117/12.929501.

[2] Palenskis, V.; Matukas, J.; Maknys, K.; Stadalnikas, A. Flicker noise generation mechanism and its relation to the defectiveness of materials and electronic devices, Proc. of Int. NODITO Workshop, 1995, 143-150.
